# Supplementary material for: Construction of circRNA-miRNA-mRNA network and identification of novel potential biomarkers for non-small cell lung cancer
Source: PubMed Central journal article supplement (PMC8605517; doi:10.1186/s12935-021-02278-z), 2021-11-20

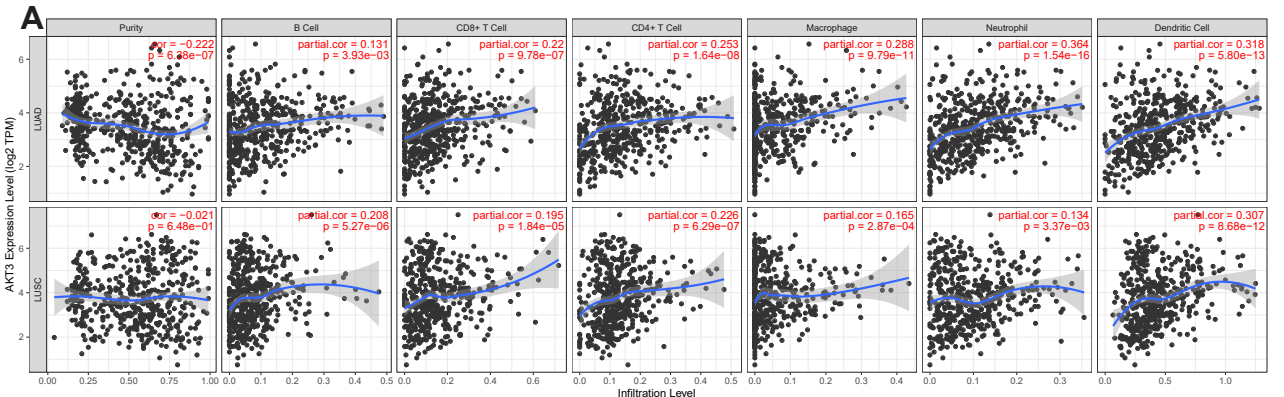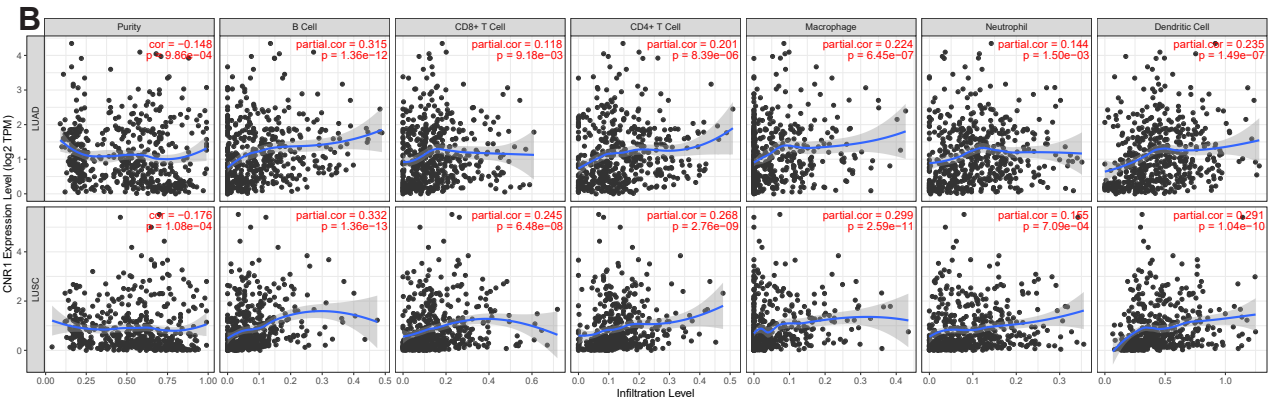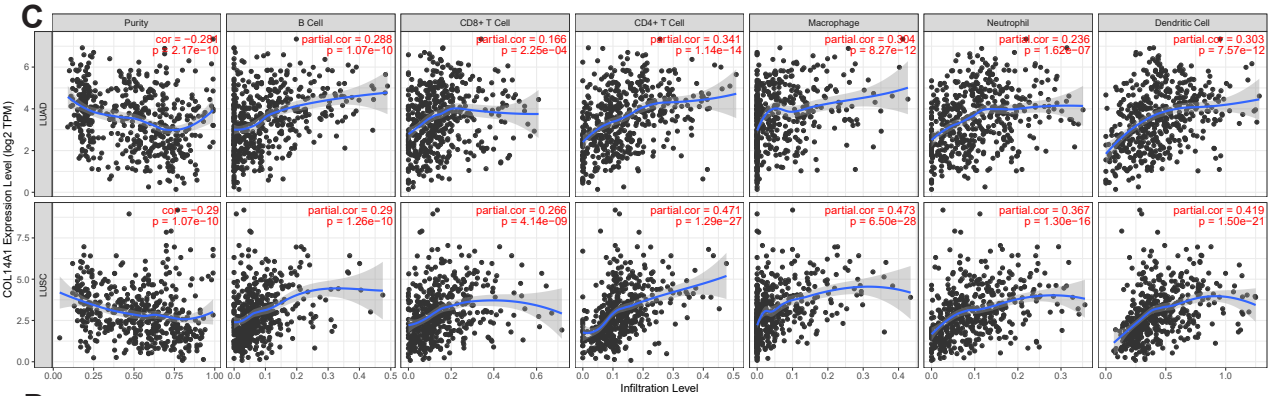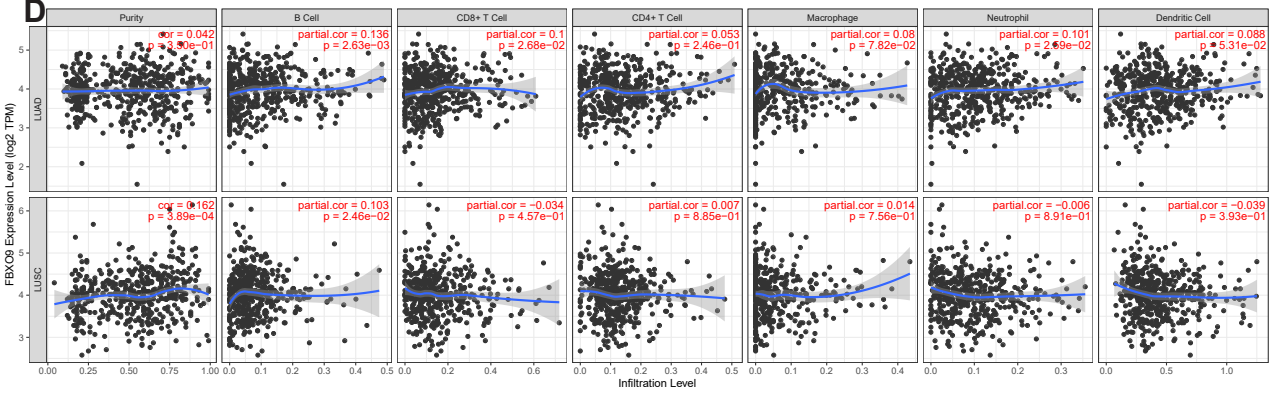

Supplement: 12935_2021_2278_MOESM6_ESM.pdf [file 12935_2021_2278_MOESM6_ESM.pdf]
